# Supplementary material for: Gamma-band synchronization in visual cortex predicts speed of change detection
Source: Springer Nature journal article supplement (doi:10.1038/nature04258), 2005-12-21
Supplement: 41586_2006_BFnature04258_MOESM3_ESM.pdf [file 41586_2006_BFnature04258_MOESM3_ESM.pdf]

## Supplementary Table:

Gamma-band synchronization in visual cortex predicts speed of change detection

Thilo Womelsdorf\*, Pascal Fries\*, Partha P. Mitra, Robert Desimone

\*These authors contributed equally to this work.

|          | LFP - power     |                  | Spike-field coherence |                |
|----------|-----------------|------------------|-----------------------|----------------|
|          | monkey P        | monkey R         | monkey P              | monkey R       |
| 42-72 Hz | -0.05*** (68 %) | -0.10*** (100 %) | -0.01* (59 %)         | -0.02* (58 %)  |
| 8-12 Hz  | 0.03** (70 %)   | 0.02 (58 %)      | 0 (44 %)              | 0.02*** (63 %) |

**Supplementary Table:** Average Fisher z-transformed correlation coefficients for LFP-power and spike-field coherence with reaction time for monkey P and monkey R for the gamma frequency band and the alpha/beta frequency band. The correlations are averages of the analysis windows zero-centered within the time interval from 0 - 75 ms after the change event. Stars denote significance levels of correlations (\* =  $p < 0.05$ , \*\* =  $p < 0.01$ , \*\*\* =  $p < 0.001$ ). The number in brackets show the proportion of cells with negative reaction time correlations (for the 42-72 Hz frequency range) and positive reaction time correlations (for the 8-12 Hz frequency range).
