# Supplementary material for: Gamma-band synchronization in visual cortex predicts speed of change detection
Source: Springer Nature journal article supplement (doi:10.1038/nature04258), 2005-12-21
Supplement: 41586_2006_BFnature04258_MOESM4_ESM.pdf [file 41586_2006_BFnature04258_MOESM4_ESM.pdf]

## Supplementary Figure 1:

Gamma-band synchronization in visual cortex predicts speed of change detection

Thilo Womelsdorf\*, Pascal Fries\*, Partha P. Mitra, Robert Desimone

\*These authors contributed equally to this work.

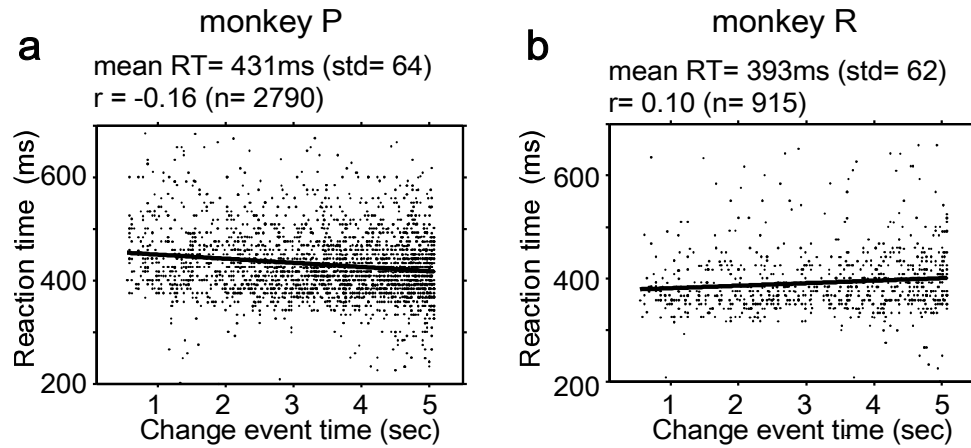

**Supplementary Figure 1** Scatter plot of reaction times as a function of time after stimulus onset. The two panels show data from the two monkeys and each dot corresponds to the reaction time in a single trial.
