# Supplementary material for: Gamma-band synchronization in visual cortex predicts speed of change detection
Source: Springer Nature journal article supplement (doi:10.1038/nature04258), 2005-12-21
Supplement: 41586_2006_BFnature04258_MOESM5_ESM.pdf [file 41586_2006_BFnature04258_MOESM5_ESM.pdf]

## Supplementary Figure 2:

Gamma-band synchronization in visual cortex predicts speed of change detection

Thilo Womelsdorf\*, Pascal Fries\*, Partha P. Mitra, Robert Desimone

\*These authors contributed equally to the work.

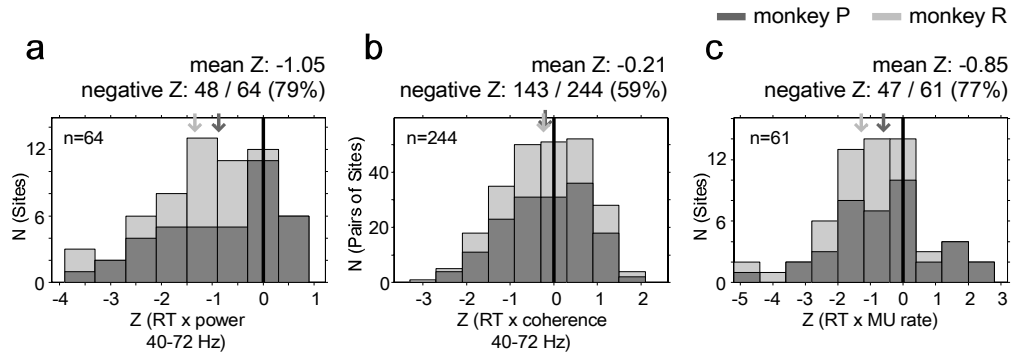

**Supplementary Figure 2** Histograms of z-scores for the correlations between reaction times and gamma-band (40 - 72 Hz) power (**a**), gamma-band spike-field coherence (**b**) and firing rate (**c**). Histograms were compiled across individual recording sites (power and firing rate) or pairs of recording sites (coherence). Data from the two monkey are shown in black and grey, respectively. The z-scores were averaged across analysis windows centered on 0 - 75 ms after the change event. Black and grey arrows denote the average z-score of the distribution of the respective monkey.
